# Supplementary material
Source: PubMed Central journal article supplement (PMC7144830)
Supplement: NIHMS1549531-supplement-Supplemental_Digital_Content.pdf [file NIHMS1549531-supplement-Supplemental_Digital_Content.pdf]

---

**Demographic Characteristics**


---

**Demographic factors<sup>a</sup>**

|                                  |                  |
|----------------------------------|------------------|
| Age, years (range)               | 27 (22.75–31.25) |
| Weight, kg (range)               | 67.4 (60.4–76.8) |
| BMI <sup>a</sup> (range)         | 24.1 (21.6–26.9) |
| Time on ART, years (range)       | >5 (0.17–>5)     |
| CD4 count, cells/mm <sup>3</sup> | 583 (361–1303)   |

**Race**

|                    |   |
|--------------------|---|
| White              | 7 |
| African American   | 4 |
| Asian American     | 2 |
| American Indian    | 0 |
| More than one race | 0 |

---

<sup>a</sup>Data are median value (interquartile range) or number of subjects. Body mass index (BMI) is calculated as the weight in kilograms divided by the height in square meters.

**Supplemental Table 1: HIV-infected ART-suppressed donor demographics.**

1  
2  
3

| Donor 1: Tenofovir (TAF), emtricitabine, dolutegravir |                             |                |                               |                | Donor 2: Tenofovir (TAF), emtricitabine, dolutegravir |                |                   |                |
|-------------------------------------------------------|-----------------------------|----------------|-------------------------------|----------------|-------------------------------------------------------|----------------|-------------------|----------------|
| ARV Concentration (ng/ml)                             |                             |                |                               |                | ARV Concentration (ng/ml)                             |                |                   |                |
| ARV                                                   | EV-Free Blood Plasma (EFBP) | Blood EVs (BE) | EV-Free Seminal Plasma (EFSP) | Semen EVs (SE) | EV-Free Blood Plasma (EFBP)                           | Blood EVs (BE) | EV-Free SP (EFSP) | Semen EVs (SE) |
| TFV-TAF                                               | 17.16                       | 4.28           | 221.4                         | 46.47          | 8.484                                                 | 1.847          | 115.4             | 14.42          |
| TFV-TDF                                               | BLQ                         | BLQ            | 0.1099                        | BLQ            | BLQ                                                   | BLQ            | 0.1338            | BLQ            |
| FTC                                                   | 1379                        | 388.6          | 1650                          | 357.5          | 692.5                                                 | 146.7          | 5199              | 711.2          |
| FTC-TP                                                | 0.1860                      | 0.4263         | 0.1141                        | BLQ            | BLQ                                                   | BLQ            | 0.7078            | 0.1178         |
| DTG                                                   | 3286                        | 962.9          | 68.55                         | 35.12          | 3252                                                  | 724.9          | 134.3             | 62.83          |
| Donor 3: Tenofovir (TDF), emtricitabine, efavirenz    |                             |                |                               |                | Donor 4: Tenofovir (TDF), emtricitabine, efavirenz    |                |                   |                |
| ARV Concentration (ng/ml)                             |                             |                |                               |                | ARV Concentration (ng/ml)                             |                |                   |                |
| ARV                                                   | EFBP                        | BE             | EFSP                          | SE             | EFBP                                                  | BE             | EFSP              | SE             |
| TFV-TDF                                               | 42.38                       | 10.87          | 738.2                         | 122.9          | 84.26                                                 | 18.21          | LIP               | 76.18          |
| TFV-DP                                                | BLQ                         | 0.1030         | 0.3652                        | BLQ            | BLQ                                                   | 0.3302         | LIP               | BLQ            |
| FTC                                                   | 242.4                       | 62.24          | 2169                          | 346.5          | 184.5                                                 | 39.70          | LIP               | 119.7          |
| FTC-TP                                                | BLQ                         | BLQ            | 0.2594                        | 0.2632         | BLQ                                                   | BLQ            | LIP               | BLQ            |
| EFV                                                   | 1110                        | 737.0          | 42.64                         | 58.09          | 550.7                                                 | 390.8          | LIP               | 52.63          |

4 **Supplemental Table 2: ARV concentrations in extracellular vesicle-free plasma and extracellular vesicles from HIV-infected ART-**

5 **suppressed donor blood and semen.** EV=extracellular vesicle. TFV=tenofovir; TAF=tenofovir alafenamide; TDF=tenofovir disoproxil

6 fumarate; TFVdp=tenofovir diphosphate; FTC=emtricitabine; FTCtp=emtricitabine triphosphate; DTG=dolutegravir; EFV=efavirenz.

7 BLQ=below quantitation. LIP=lost in processing

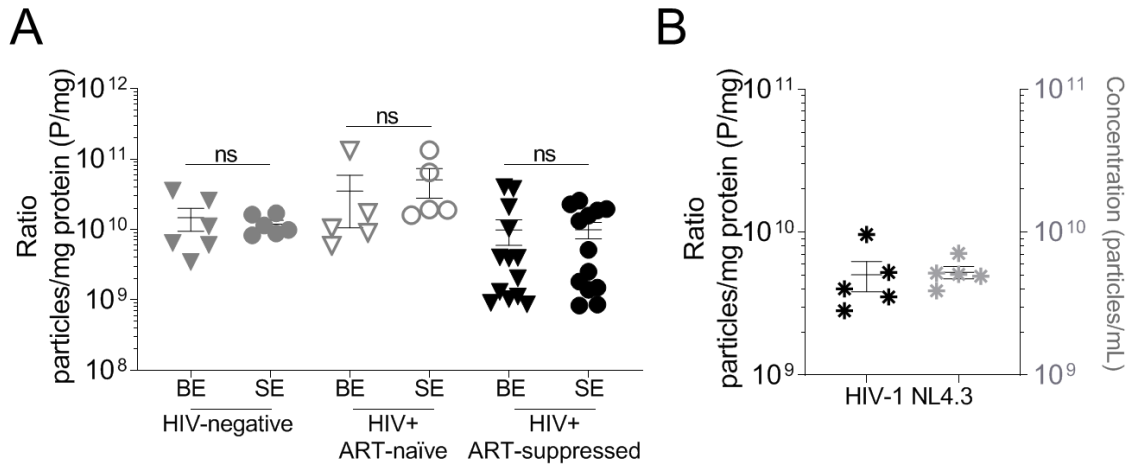

8

9 **Supplemental Figure 1: Donor-derived blood and semen extracellular vesicles contain**

10 **similar concentrations of particles per mg of protein.** (A) BE and SE were isolated from

11 HIV-negative (n=6), HIV-positive ART-naïve (n=5), and HIV-positive ART-suppressed (n=13)

12 donors. (B) HIV-1 NL4.3 virus preps (n=5) were produced by pNL4.3 293T transfection.

13 Concentrations were calculated as the ratio of particles per mg of protein or virus culture and

14 grouped by donor cohort. Particle numbers were determined by ZetaView nanoparticle tracking

15 analysis (NTA), and protein by Nanodrop absorbance at 280 nm. Significance was determined

16 by student's t test. Error bars are SD of biological replicates. ns= not significant.

17

18

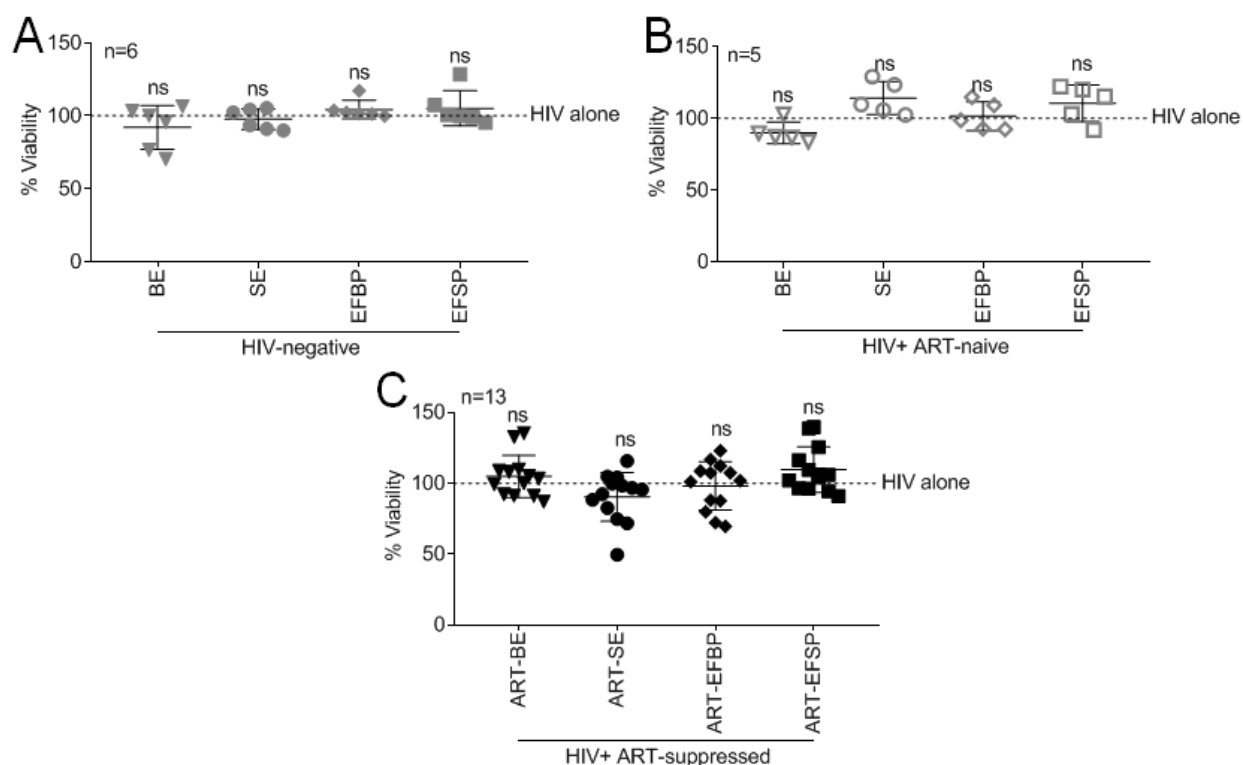

19 **Supplemental Figure 2: Donor-derived extracellular vesicles and extracellular vesicle-free**  
 20 **plasma do not reduce cell viability.** (A-C) Vehicle PBS or 100 µg/ml BE, SE, EFBP, and  
 21 EFBP isolated from HIV-negative (n=6), HIV-positive ART-naïve (n=5), and HIV-positive ART-  
 22 suppressed (n=13) donors were added simultaneously with 100,000RLU of HIV-1 NL4.3 virus to  
 23 TZM-bl indicator cells for 24 h. TZM-bl viability was measured by MTT assay. Vehicle treated  
 24 cells viability are set as reference at 100% (broken line). (A) TZM-bl cell viability of HIV-1 treated  
 25 with BE, SE, EFBP, and EFSP from HIV-negative donors. (B) TZM-bl cell viability of HIV-1  
 26 treated with BE, SE, EFBP, and EFSP from HIV-positive ART-naïve donors. (C) TZM-bl cell  
 27 viability of HIV-1 treated with BE, SE, EFBP, and EFSP from HIV-positive ART-suppressed  
 28 donors. Statistics was determined by comparing infectivity values from all donors to vehicle  
 29 control for each treatment. Significance was determined by student's t test. Error bars are SD of  
 30 biological replicates from the mean of triplicate measurements. ns= not significant.

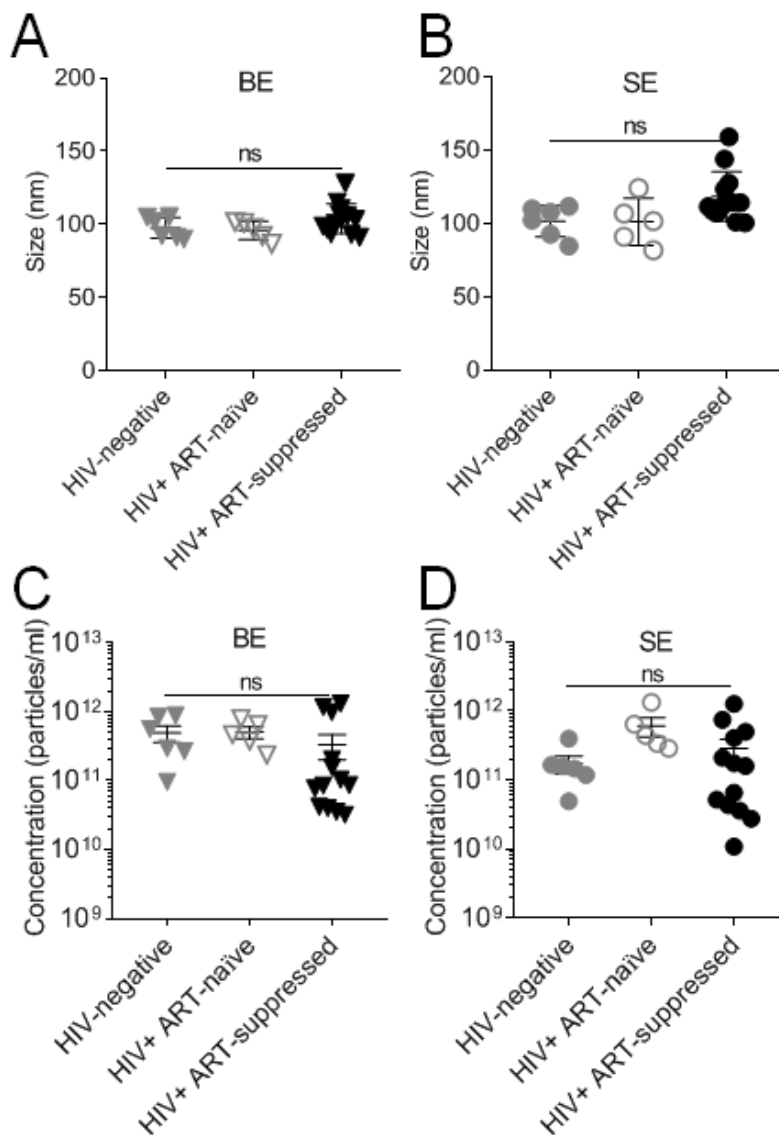

31 **Supplemental Figure 3: Donor HIV and ART status does not affect extracellular vesicle**  
 32 **size or concentration.** BE and SE were isolated from HIV-negative (n=6), HIV-positive ART-  
 33 naïve (n=5), and HIV-positive ART-suppressed (n=13) donors. (A-B) mean size (nm) of BE (A)  
 34 and SE (B) grouped by donor cohort. (C-D) particle concentration per mL of plasma of BE (C)  
 35 and SE (D) grouped by donor cohort. Size and concentration measurements were determined  
 36 by ZetaView nanoparticle tracking analysis (NTA). Significance was determined by one-way  
 37 ANOVA. Error bars are SD of biological replicates. ns= not significant.

38

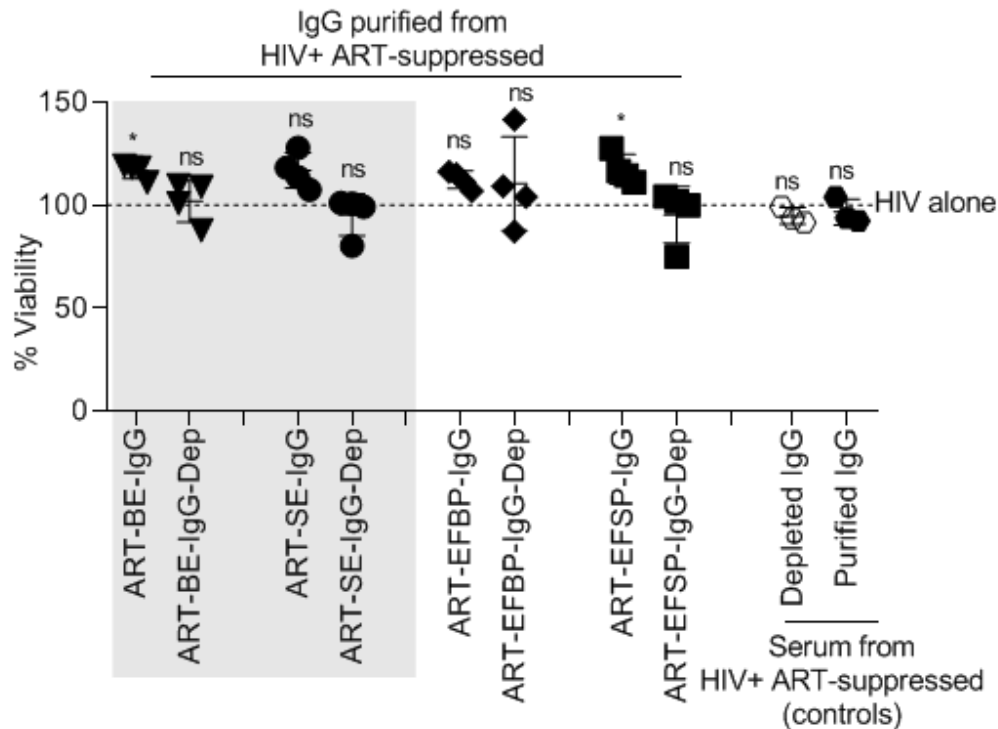

39 **Supplemental Figure 4: HIV-1-specific IgG does not reduce cell viability.** A series of  
 40 immuno-capture techniques purified IgG from HIV-infected ART-suppressed extracellular  
 41 vesicle-free plasma and extracellular vesicles (n=4). Viability was determined by incubation of  
 42 100,000RLU HIV-1 NL4.3 virus with purified and depleted IgG fractions, IgG controls, or vehicle  
 43 PBS on TZM-bl cells for 24 h. Viability was measured by MTT assay. Vehicle treated cells are  
 44 set as reference at 100% (broken line). Statistics was determined by comparing viability values  
 45 from all donors to vehicle control for each IgG fraction. Significance was determined by  
 46 student's t test. \*=P<0.05, \*\*=P<0.01, \*\*\*=P<0.001. Error bars are SD of biological replicates  
 47 from the mean of triplicate measurements. ns= not significant.

48

49

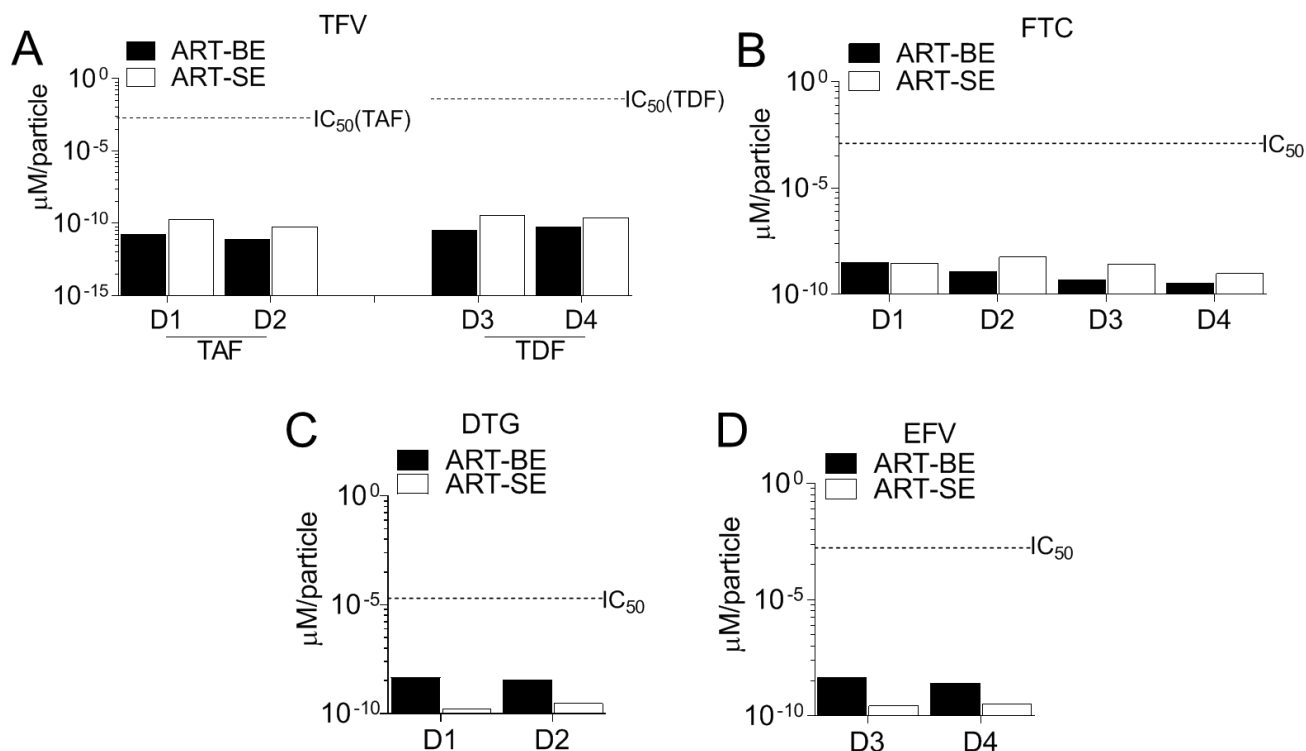

50

51 **Supplemental Figure 5: ARV drug concentrations per extracellular vesicle particle from**

52 **HIV-infected ART-suppressed donors.** EVs were isolated from HIV-positive ART-suppressed

53 donors' plasma (ART-BE) and semen (ART-SE). Drug concentrations were measured by LC-

54 MS/MS from 4 donors with similar drug regimen. ARVs are denoted as (A) TFV (tenofovir), (B)

55 FTC (emtricitabine), (C) DTG (dolutegravir), (D) EFV (efavirenz). Broken lines indicate FDA-half

56 maximal inhibitory concentrations ( $IC_{50}$ ) for HIV-1. Particle numbers were determined by

57 ZetaView nanoparticle tracking analysis (NTA), and protein by Nanodrop absorbance at 280nm.

58 Estimations of  $\mu\text{M}$  ARV/particle were calculated from particles/mg and  $\mu\text{M}$  ARV/50 $\mu\text{g}$  EV.

59

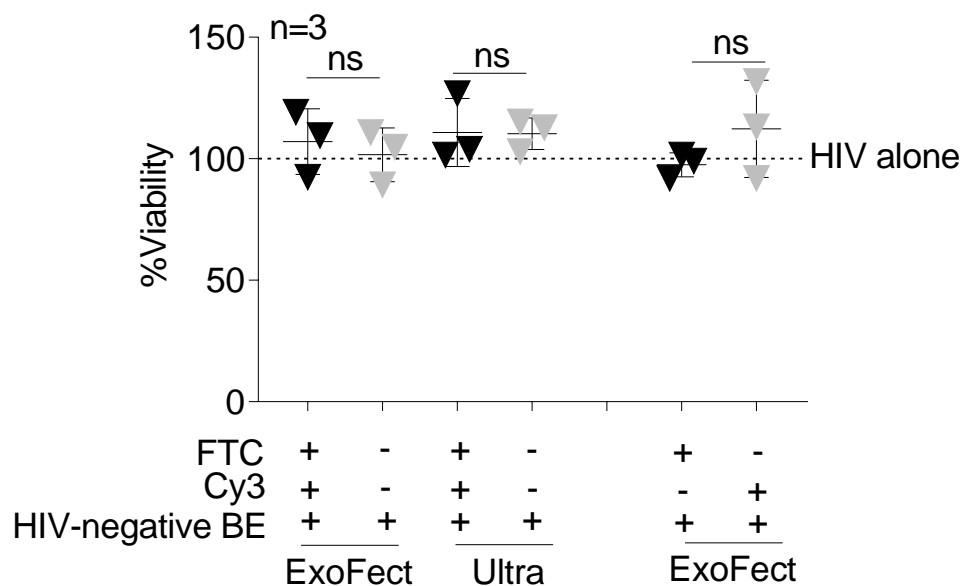

60 **Supplemental Figure 6: BE functionalized with ART do not alter cell viability.** 200  $\mu$ g BE  
 61 from HIV-negative donors (n=3) were loaded with 50  $\mu$ g Cy3 labeled emtricitabine (FTC) by two  
 62 methods (ExoFect vs. Ultra). Viability was determined by incubation of 100,000RLU HIV-1  
 63 NL4.3 virus in the presence of 100  $\mu$ g/ml FTC-loaded BE, BE-loading controls, or vehicle PBS  
 64 control on TZM-bl indicator cells for 24 h. Viability was measured by MTT assay. Vehicle treated  
 65 cells are set as reference at 100% (broken line). Statistics was determined by comparing FTC-  
 66 loaded BE to relevant controls. Significance was determined by student's t test. Error bars are  
 67 SD of biological replicates from the mean of triplicate measurements. ns= not significant.
